# Supplementary material
Source: publisher figshare collection journal article supplement (https://gsajournals.figshare.com/ndownloader/files/13792055)
Supplement: Supplementary file 1 [file 13792055]

|  | Cardiomyocytes | Hepatocytes | mESCs |
| --- | --- | --- | --- |
| Total peaks | 23,809 | 29,138 | 67,192 |
| Overlap germ cell cis-hQTL | 360 | 422 | 1486 |
| Different in parents (fdr < 0.05) | 239 | 264 | 1152 |
| Effect in same direction | 80 | 143 | 609 |

**Table S7.** Number of H3K4me3 sites in indicated cell types that overlap *cis-*regulated H3K4me3 sites in germ cells with LOD scores greater than 10 (n = 4,358).
